# Supplementary material
Source: PubMed Central journal article supplement (PMC5784791)
Supplement: Supp_Table5.pdf [file Supp_Table5.pdf]

SUPPLEMENTARY TABLE S5. LOGISTIC REGRESSION MODELS TO EXPLORE PREDICTIVE VALUE OF LITIGATION STATUS (DV ≥30 vs. <30 DAYS OF SYMPTOMS)

|                             | <i>Without litigation</i> |          | <i>With litigation</i> |          |
|-----------------------------|---------------------------|----------|------------------------|----------|
|                             | <i>OR or β (SE)</i>       | <i>p</i> | <i>OR or β (SE)</i>    | <i>p</i> |
| Litigation only             | -                         | -        | 3.89                   | 0.001    |
| Model 1: Demo               |                           |          |                        |          |
| Group                       |                           | 0.016    |                        | 0.023    |
| mTBI LOC- (vs. control)     | 0.34                      | 0.008    | 0.32                   | 0.008    |
| mTBI LOC+ (vs. control)     | 1.14                      | 0.775    | 0.96                   | 0.941    |
| Litigation                  | -                         | -        | 3.84                   | 0.002    |
| Model 2: Demo+Sx            |                           |          |                        |          |
| BSI-18 somatization         | 0.59 (.21)                | 0.006    | 0.57 (0.22)            | 0.009    |
| Group                       |                           | 0.004    |                        | 0.006    |
| mTBI LOC- (vs. control)     | 0.24                      | 0.001    | 0.23                   | 0.002    |
| mTBI LOC+ (vs. control)     | 0.81                      | 0.807    | 0.74                   | 0.558    |
| Litigation                  | -                         | -        | 3.72                   | 0.003    |
| Model 3: Demo+Sx+Neurocog   |                           |          |                        |          |
| BSI-18 somatization         | 0.53 (.22)                | 0.017    | 0.55 (.23)             | 0.016    |
| Group                       |                           | 0.009    |                        | 0.008    |
| mTBI LOC- (vs. control)     | 0.25                      | 0.003    | 0.22                   | 0.002    |
| mTBI LOC+ (vs. control)     | 0.79                      | 0.652    | 0.68                   | 0.469    |
| DANA taken (yes vs. no)     | 1.40                      | 0.534    | 1.91                   | 0.261    |
| DANA simple reaction time 2 | 0.47                      | 0.003    | 0.49                   | 0.006    |
| Litigation                  | -                         | -        | 3.75                   | 0.005    |

BSI-18, Brief Symptom Inventory-18; DANA, Defense Automated Neurobehavioral Assessment; Demo, demographics and injury variables; DV, dependent variable; LOC, loss of consciousness; mTBI, mild traumatic brain injury; Neurocog, neurocognitive/performance measures; OR, odds ratio; SE, standard error; Sx, symptoms.
