# Supplementary material
Source: PubMed Central journal article supplement (PMC5784791)
Supplement: Supp_Tables1-4.pdf [file Supp_Tables1-4.pdf]

## Supplementary Data

SUPPLEMENTARY TABLE S1. MULTIVARIATE  
“DEMOGRAPHICS” MODEL INCLUDING DEMOGRAPHIC,  
HISTORY, AND INJURY VARIABLES

|                         | <i>HR</i> | <i>95% CI</i> | <i>p</i> |
|-------------------------|-----------|---------------|----------|
| Group                   |           |               | 0.003    |
| mTBI LOC- (vs. control) | 1.96      | (1.24, 3.10)  | 0.004    |
| mTBI LOC+ (vs. control) | 0.77      | (0.40, 1.48)  | 0.427    |

*n* = 149.

CI, confidence interval; HR, hazard ratio; LOC, loss of consciousness;  
mTBI, mild traumatic brain injury.

SUPPLEMENTARY TABLE S2. MULTIVARIATE  
 “DEMOGRAPHICS+SYMPTOMS” MODEL INCLUDING  
 DEMOGRAPHIC, HISTORY, INJURY,  
 AND SYMPTOM VARIABLES

|                         | <i>HR</i> | <i>95% CI</i> | <i>p</i> |
|-------------------------|-----------|---------------|----------|
| BSI-18 somatization     | 0.62      | (0.47, 0.81)  | 0.001    |
| Group                   |           |               | <0.001   |
| mTBI LOC- (vs. control) | 2.60      | (1.60, 4.24)  | <0.001   |
| mTBI LOC+ (vs. control) | 0.96      | (0.50, 1.86)  | 0.907    |

*n* = 149.

BSI-18, Brief Symptom Inventory-18; CI, confidence interval; HR, hazard ratio; LOC, loss of consciousness; mTBI, mild traumatic brain injury.

SUPPLEMENTARY TABLE S3. MULTIVARIATE  
MODEL ADDING ANAM CNT VARIABLES  
TO DEMOGRAPHICS+SYMPTOM MODEL

|                             | <i>HR</i> | <i>95% CI</i> | <i>p</i> |
|-----------------------------|-----------|---------------|----------|
| BSI-18 somatization         | 0.62      | (0.47, 0.81)  | 0.001    |
| Group                       |           |               | <0.001   |
| mTBI LOC- (vs. control)     | 2.71      | (1.67, 4.41)  | <0.001   |
| mTBI LOC+ (vs. control)     | 1.07      | (.55, 2.10)   | 0.843    |
| ANAM taken (yes vs. no)     | 1.01      | (.63, 1.61)   | 0.974    |
| ANAM simple reaction time 2 | 1.92      | (1.23, 3.01)  | 0.004    |

*n* = 149. A model using complete cases only (*n* = 77) revealed similar effect sizes: BSI-18 somatization subscale HR = 0.62, mTBI LOC- (vs. Control) HR = 2.71, mTBI LOC+ (vs. Control) HR = 1.07, and ANAM simple reaction time 2 of HR = 1.93.

ANAM, Automatic Neuropsychological Assessment Metrics; BSI-18, Brief Symptom Inventory-18; CI, confidence interval; CNT, computerized neurocognitive test; HR, hazard ratio; LOC, loss of consciousness; mTBI, mild traumatic brain injury.

SUPPLEMENTARY TABLE S4. MULTIVARIATE  
MODEL ADDING DANA CNT VARIABLES  
TO DEMOGRAPHICS+SYMPTOM MODEL

|                         | <i>HR</i> | <i>95% CI</i> | <i>p</i> |
|-------------------------|-----------|---------------|----------|
| BSI-18 somatization     | 0.63      | (0.48, 0.84)  | 0.001    |
| Group                   |           |               | <0.001   |
| mTBI LOC- (vs. control) | 2.53      | (1.56, 4.10)  | <0.001   |
| mTBI LOC+ (vs. control) | 1.08      | (0.55, 2.09)  | 0.830    |
| Dana taken (yes vs. no) | 0.84      | (0.44, 1.63)  | 0.608    |
| DANA reaction time      | 1.70      | (1.28, 2.25)  | <0.001   |

*n* = 149. A model using complete cases only (*n* = 129) revealed similar effect sizes: BSI-18 somatization subscale HR = 0.64, mTBI LOC- (vs. Control) HR = 2.52, mTBI LOC+ (vs. Control) HR = 1.07, and DANA simple reaction time HR = 1.68.

BSI-18, Brief Symptom Inventory-18; CI, confidence interval; CNT, computerized neurocognitive test; DANA, Defense Automated Neurobehavioral Assessment; HR, hazard ratio; LOC, loss of consciousness; mTBI, mild traumatic brain injury.
